# Supplementary material
Source: ML conference proceedings conference paper supplement (https://openreview.net/forum?id=5xAhArE66p)
Supplement: supplementary_material [file attachment]

# Full Title of Article This Title Has A Line Break\*

**Author Name1**<sup>†</sup>      ABC@SAMPLE.COM and **Author Name2**      XYZ@SAMPLE.COM  
*Address*

**Editor:** Editor’s name

## Abstract

This is the abstract for this article.

**Keywords:** List of keywords

## 1. Introduction

This is a sample article that uses the `jmlr` class with the `pmlr` class option. Please follow the guidelines in this sample document as it can help to reduce complications when combining the articles into a book. Please avoid using obsolete commands, such as `\rm`, and obsolete packages, such as `epsfig`.<sup>1</sup>

Please also ensure that your document will compile with PDF<sub>LA</sub>T<sub>E</sub>X. If you have an error message that’s puzzling you, first check for it at the UK TUG FAQ <https://texfaq.org/FAQ-man-latex>. If that doesn’t help, create a minimal working example (see <https://www.dickimaw-books.com/latex/minexample>) and post to somewhere like TeX on StackExchange (<https://tex.stackexchange.com/>) or the LaTeX Community Forum (<https://latex.org/forum/>).

NOTE:

This is an numbered theorem-like environment that was defined in this document’s preamble.

### 1.1. Sub-sections

Sub-sections are produced using `\subsection`.

#### 1.1.1. SUB-SUB-SECTIONS

Sub-sub-sections are produced using `\subsubsection`.

**Sub-sub-sub-sections** Sub-sub-sub-sections are produced using `\paragraph`. These are unnumbered with a running head.

***Sub-sub-sub-sub-sections*** Sub-sub-sub-sub-sections are produced using `\subparagraph`. These are unnumbered with a running head.

---

\* sample footnote

<sup>†</sup> with a note

1. See <http://www.ctan.org/pkg/l2tabu>

## 2. Cross-Referencing

Always use `\label` and `\ref` (or one of the commands described below) when cross-referencing. For example, the next section is Section 3. The `jmlr` class provides some convenient cross-referencing commands: `\sectionref`, `\equationref`, `\tableref`, `\figureref`, `\algorithmref`, `\theoremref`, `\lemmaref`, `\remarkref`, `\corollaryref`, `\definitionref`, `\conjectureref`, `\axiomref`, `\exempleref` and `\appendixref`. The argument of these commands may either be a single label or a comma-separated list of labels. Examples:

Referencing sections: Section 3 or Sections 1 and 3 or Sections 1, 3, 5.1 and 5.2.

Referencing equations: Equation (1) or Equations (1) and (3) or Equations (1), (2), (3) and (4).

Referencing tables: Table 1 or Tables 1 and 2 or Tables 1, 2 and 3.

Referencing figures: Figure 1 or Figures 1 and 2 or Figures 1, 2 and 3 or Figures 3(a) and 3(b).

Referencing algorithms: Algorithm 1 or Algorithms 1 and 2 or Algorithms 1, 2 and 3.

Referencing theorem-like environments: Theorem 1, Lemma 2, Remark 3, Corollary 4, Definition 5, Conjecture 6, Axiom 7 and Example 1.

Referencing appendices: Appendix A or Appendices A and B.

## 3. Equations

The `jmlr` class loads the `amsmath` package, so you can use any of the commands and environments defined there. (See the `amsmath` documentation for further details.<sup>2</sup>)

Unnumbered single-lined equations should be displayed using `\[` and `\]`. For example:

$$E = mc^2$$

Numbered single-line equations should be displayed using the `equation` environment. For example:

$$\cos^2 \theta + \sin^2 \theta \equiv 1 \tag{1}$$

This can be referenced using `\label` and `\equationref`. For example, Equation (1).

Multi-lined numbered equations should be displayed using the `align` environment.<sup>3</sup> For example:

$$f(x) = x^2 + x \tag{2}$$

$$f'(x) = 2x + 1 \tag{3}$$

Unnumbered multi-lined equations should be displayed using the `align*` environment. For example:

$$\begin{aligned} f(x) &= (x+1)(x-1) \\ &= x^2 - 1 \end{aligned}$$

---

2. Either `texdoc amsmath` or <http://www.ctan.org/pkg/amsmath>

3. For reasons why you shouldn't use the obsolete `eqnarray` environment, see Lars Madsen, *Avoid eqnarray!* TUGboat 33(1):21–25, 2012.

If you want to mix numbered with unnumbered lines use the `align` environment and suppress unwanted line numbers with `\nonumber`. For example:

$$\begin{aligned} y &= x^2 + 3x - 2x + 1 \\ &= x^2 + x + 1 \end{aligned} \tag{4}$$

An equation that is too long to fit on a single line can be displayed using the `split` environment. Text can be embedded in an equation using `\text` or `\intertext` (as used in Theorem 1). See the `amsmath` documentation for further details.

### 3.1. Operator Names

Predefined operator names are listed in Table 1. For additional operators, either use `\operatorname`, for example `\operatorname{var}(X)` or declare it with `\DeclareMathOperator`, for example

`\DeclareMathOperator{\var}{var}`

and then use this new command. If you want limits that go above and below the operator (like `\sum`) use the starred versions (`\operatorname*` or `\DeclareMathOperator*`).

Table 1: Predefined Operator Names (taken from `amsmath` documentation)

|                      |                     |                         |                     |                          |                      |                       |                      |
|----------------------|---------------------|-------------------------|---------------------|--------------------------|----------------------|-----------------------|----------------------|
| <code>\arccos</code> | <code>arccos</code> | <code>\deg</code>       | <code>deg</code>    | <code>\lg</code>         | <code>lg</code>      | <code>\projlim</code> | <code>projlim</code> |
| <code>\arcsin</code> | <code>arcsin</code> | <code>\det</code>       | <code>det</code>    | <code>\lim</code>        | <code>lim</code>     | <code>\sec</code>     | <code>sec</code>     |
| <code>\arctan</code> | <code>arctan</code> | <code>\dim</code>       | <code>dim</code>    | <code>\liminf</code>     | <code>lim inf</code> | <code>\sin</code>     | <code>sin</code>     |
| <code>\arg</code>    | <code>arg</code>    | <code>\exp</code>       | <code>exp</code>    | <code>\limsup</code>     | <code>lim sup</code> | <code>\sinh</code>    | <code>sinh</code>    |
| <code>\cos</code>    | <code>cos</code>    | <code>\gcd</code>       | <code>gcd</code>    | <code>\ln</code>         | <code>ln</code>      | <code>\sup</code>     | <code>sup</code>     |
| <code>\cosh</code>   | <code>cosh</code>   | <code>\hom</code>       | <code>hom</code>    | <code>\log</code>        | <code>log</code>     | <code>\tan</code>     | <code>tan</code>     |
| <code>\cot</code>    | <code>cot</code>    | <code>\inf</code>       | <code>inf</code>    | <code>\max</code>        | <code>max</code>     | <code>\tanh</code>    | <code>tanh</code>    |
| <code>\coth</code>   | <code>coth</code>   | <code>\injlim</code>    | <code>injlim</code> | <code>\min</code>        | <code>min</code>     |                       |                      |
| <code>\csc</code>    | <code>csc</code>    | <code>\ker</code>       | <code>ker</code>    | <code>\Pr</code>         | <code>Pr</code>      |                       |                      |
|                      |                     | <code>\varlimsup</code> | $\overline{\lim}$   | <code>\varinjlim</code>  | $\varinjlim$         |                       |                      |
|                      |                     | <code>\varliminf</code> | $\underline{\lim}$  | <code>\varprojlim</code> | $\varprojlim$        |                       |                      |

## 4. Vectors and Sets

Vectors should be typeset using `\vec`. For example  $\mathbf{x}$ . The `jmlr` class also provides `\set` to typeset a set. For example  $\mathcal{S}$ .

## 5. Floats

Floats, such as figures, tables and algorithms, are moving objects and are supposed to float to the nearest convenient location. Please don't force them to go in a particular place. In general it's best to use the `htbp` specifier and don't put the figure or table in the middle of a paragraph (that is make sure there's a paragraph break above and below the float).

Floats are supposed to have a little extra space above and below them to make them stand out from the rest of the text. This extra spacing is put in automatically and shouldn't need modifying.

To ensure consistency, please *don't* try changing the format of the caption by doing something like:

```
\caption{\textit{A Sample Caption.}}
```

or

```
\caption{\em A Sample Caption.}
```

You can, of course, change the font for individual words or phrases, for example:

```
\caption{A Sample Caption With Some \emph{Emphasized Words}.}
```

### 5.1. Tables

Tables should go in the `table` environment. Within this environment use `\floatconts` (defined by `jmlr`) to set the caption correctly and center the table contents.

Table 2: An Example Table

| <b>Dataset</b> | <b>Result</b> |
|----------------|---------------|
| Data1          | 0.12345       |
| Data2          | 0.67890       |
| Data3          | 0.54321       |
| Data4          | 0.09876       |

If you want horizontal rules you can use the `booktabs` package which provides the commands `\toprule`, `\midrule` and `\bottomrule`. For example, see Table 3.

Table 3: A Table With Horizontal Lines

| <b>Dataset</b> | <b>Result</b> |
|----------------|---------------|
| Data1          | 0.12345       |
| Data2          | 0.67890       |
| Data3          | 0.54321       |
| Data4          | 0.09876       |

If you want vertical lines as well, you can't use the `booktabs` commands as there'll be some unwanted gaps. Instead you can use L<sup>A</sup>T<sub>E</sub>X's `\hline`, but the rows may appear a bit cramped. You can add extra space above or below a row using `\abovestrut` and `\belowstrut`. For example, see Table 4.

If you want to align numbers on their decimal point, you can use the `siunitx` package. For example, see Table 5. For further details see the `siunitx` documentation<sup>4</sup>.

4. Either `texdoc siunitx` or <http://www.ctan.org/pkg/siunitx>

Table 4: A Table With Horizontal and Vertical Lines

| Dataset | Result  |
|---------|---------|
| Data1   | 0.12345 |
| Data2   | 0.67890 |
| Data3   | 0.54321 |
| Data4   | 0.09876 |

Table 5: A Table With Numbers Aligned on the Decimal Point

| Dataset | Result     |
|---------|------------|
| Data1   | 0.123 45   |
| Data2   | 10.6789    |
| Data3   | 50.543     |
| Data4   | 200.098 76 |

If the table is too wide, you can adjust the inter-column spacing by changing the value of `\tabcolsep`. For example:

```
\setlength{\tabcolsep}{3pt}
```

If the table is very wide but not very long, you can use the `sidewaystable` environment defined in the `rotating` package (so use `\usepackage{rotating}`). If the table is too long to fit on a page, you should use the `longtable` environment defined in the `longtable` package (so use `\usepackage{longtable}`).

## 5.2. Figures

Figures should go in the `figure` environment. Within this environment, use `\floatconts` to correctly position the caption and center the image. Use `\includegraphics` for external graphics files but omit the file extension. Do not use `\epsfig` or `\psfig`. If you want to scale the image, it's better to use a fraction of the line width rather than an explicit length. For example, see Figure 1.

If your image is made up of L<sup>A</sup>T<sub>E</sub>X code (for example, commands provided by the `pgf` package) you can include it using `\includeteximage` (defined by the `jmlr` class). This can be scaled and rotated in the same way as `\includegraphics`. For example, see Figure 2.

If the figure is too wide to fit on the page, you can use the `sidewaysfigure` environment defined in the `rotating` package.

It's best not to use `\graphicspath` with the `jmlr` class as it can cause problems with the production editing process. If the images are contained in a subdirectory, specify this when you include the image, for example `\includegraphics{figures/mypic}`.

## 5.3. Sub-Figures

Sub-figures can be created using `\subfigure`, which is defined by the `jmlr` class. The optional argument allows you to provide a subcaption. The label should be placed in

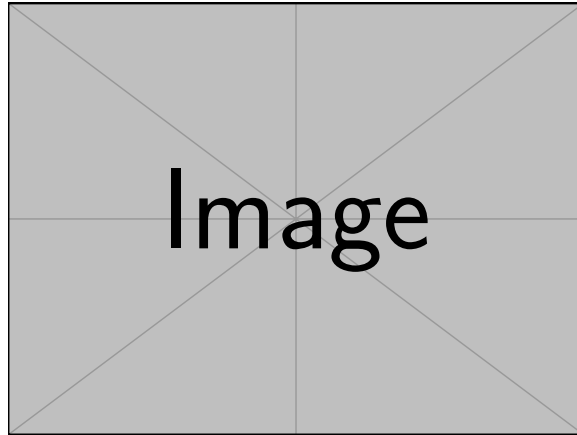

Figure 1: Example Image

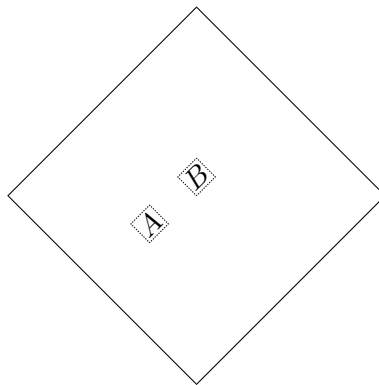

Figure 2: Image Created Using  $\text{\LaTeX}$  Code

the mandatory argument of `\subfigure`. You can reference the entire figure, for example Figure 3, or you can reference part of the figure using `\figureref`, for example Figure 3(a). Alternatively you can reference the subfigure using `\subfigref`, for example (a) and (b) in Figure 3.

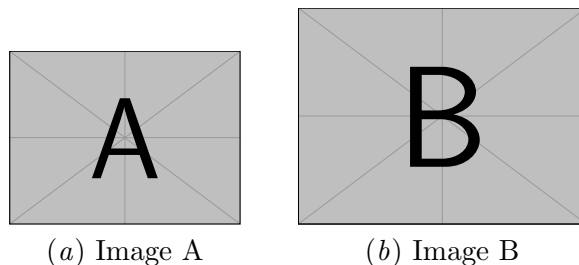

Figure 3: An Example With Sub-Figures.

By default, the sub-figures are aligned on the baseline. This can be changed using the second optional argument of `\subfigure`. This may be `t` (top), `c` (centered) or `b` (bottom). For example, the subfigures (a) and (b) in Figure 4 both have `[c]` as the second optional argument.

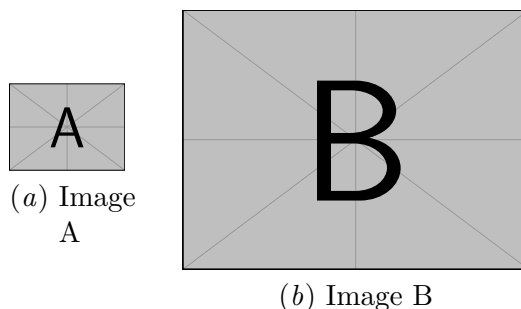

Figure 4: Another Example With Sub-Figures (with a Cramped Sub-Caption).

Note that a very narrow sub-float will leave little space for the sub-caption, which will likely cause Underfull/Overfull hbox warnings.

You can set the length `\jmlrminsubcaptionwidth` to indicate the minimum width to be made available for the sub-captions, as in Figure 5.

#### 5.4. Sub-Tables

There is an analogous command `\subtable` for sub-tables. It has the same syntax as `\subfigure` described above. You can reference the table using `\tableref`, for example Table 6 or you can reference part of the table, for example Table 6(a). Alternatively you can reference the subtable using `\subtabref`, for example (a) and (b) in Table 6.

By default, the sub-tables are aligned on the top. This can be changed using the second optional argument of `\subtable`. This may be `t` (top), `c` (centered) or `b` (bottom).

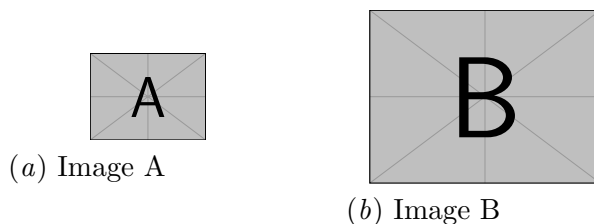

Figure 5: Another Example With Sub-Figures (with a Less Cramped Sub-Caption).

Table 6: An Example With Sub-Tables

| (a)      |          | (b)      |          |
|----------|----------|----------|----------|
| <b>A</b> | <b>B</b> | <b>C</b> | <b>D</b> |
| 1        | 2        | 3        | 4        |
|          |          | 5        | 6        |

For example, the sub-tables (a) and (b) in Table 7 both have [c] as the second optional argument.

Table 7: Another Example With Sub-Tables

| (a)      |          | (b)      |          |
|----------|----------|----------|----------|
| <b>A</b> | <b>B</b> | <b>C</b> | <b>D</b> |
| 1        | 2        | 3        | 4        |
|          |          | 5        | 6        |

## 5.5. Algorithms

Enumerated textual algorithms can be displayed using the `algorithm` environment. Within this environment, use use an `enumerate` or nested `enumerate` environments. For example, see Algorithm 1. Note that algorithms float like figures and tables.

If you'd rather have the same numbering throughout the algorithm but still want the convenient indentation of nested `enumerate` environments, you can use the `enumerate*` environment provided by the `jmlr` class. For example, see Algorithm 2.

Pseudo code can be displayed using the `algorithm2e` environment. This is defined by the `algorithm2e` package (which is automatically loaded) so check the `algorithm2e` documentation for further details.<sup>5</sup> For an example, see Algorithm 3.

## 6. Description Lists

The `jmlr` class also provides a description-like environment called `altdescription`. This has an argument that should be the widest label in the list. Compare:

---

5. Either `texdoc algorithm2e` or <http://www.ctan.org/pkg/algorithm2e>

---

**Algorithm 1:** The Gauss-Seidel Algorithm

---

1. For  $k = 1$  to maximum number of iterations
    - (a) For  $i = 1$  to  $n$ 
      - i.  $x_i^{(k)} = \frac{b_i - \sum_{j=1}^{i-1} a_{ij}x_j^{(k)} - \sum_{j=i+1}^n a_{ij}x_j^{(k-1)}}{a_{ii}}$
      - ii. If  $\|\mathbf{x}^{(k)} - \mathbf{x}^{(k-1)}\| < \epsilon$ , where  $\epsilon$  is a specified stopping criteria, stop.
- 

---

**Algorithm 2:** Moore's Shortest Path

---

Given a connected graph  $G$ , where the length of each edge is 1:

1. Set the label of vertex  $s$  to 0
  2. Set  $i = 0$
  3. Locate all unlabelled vertices adjacent to a vertex labelled  $i$  and label them  $i + 1$
  4. If vertex  $t$  has been labelled,
 

the shortest path can be found by backtracking, and the length is given by the label of  $t$ .

otherwise

increment  $i$  and return to step 3
- 

---

**Algorithm 3:** Computing Net Activation

---

**Input:**  $x_1, \dots, x_n, w_1, \dots, w_n$

**Output:**  $y$ , the net activation

```

 $y \leftarrow 0;$ 
for  $i \leftarrow 1$  to  $n$  do
  |  $y \leftarrow y + w_i * x_i;$ 
end

```

---

**add** A method that adds two variables.

**differentiate** A method that differentiates a function.

with

**add** A method that adds two variables.

**differentiate** A method that differentiates a function.

## 7. Theorems, Lemmas etc

The following theorem-like environments are predefined by the `jmlr` class: `theorem`, `example`, `lemma`, `proposition`, `remark`, `corollary`, `definition`, `conjecture` and `axiom`. You can use the `proof` environment to display the proof if need be, as in Theorem 1.

**Theorem 1 (Eigenvalue Powers)** *If  $\lambda$  is an eigenvalue of  $B$  with eigenvector  $\xi$ , then  $\lambda^n$  is an eigenvalue of  $B^n$  with eigenvector  $\xi$ .*

**Proof** *Let  $\lambda$  be an eigenvalue of  $B$  with eigenvector  $\xi$ , then*

$$B\xi = \lambda\xi$$

*premultiply by  $B$ :*

$$\begin{aligned} BB\xi &= B\lambda\xi \\ \Rightarrow B^2\xi &= \lambda B\xi \\ &= \lambda\lambda\xi && \text{since } B\xi = \lambda\xi \\ &= \lambda^2\xi \end{aligned}$$

*Therefore true for  $n = 2$ . Now assume true for  $n = k$ :*

$$B^k\xi = \lambda^k\xi$$

*premultiply by  $B$ :*

$$\begin{aligned} BB^k\xi &= B\lambda^k\xi \\ \Rightarrow B^{k+1}\xi &= \lambda^k B\xi \\ &= \lambda^k\lambda\xi && \text{since } B\xi = \lambda\xi \\ &= \lambda^{k+1}\xi \end{aligned}$$

*Therefore true for  $n = k + 1$ . Therefore, by induction, true for all  $n$ .* ■

**Lemma 2 (A Sample Lemma)** *This is a lemma.*

**Remark 3 (A Sample Remark)** *This is a remark.*

**Corollary 4 (A Sample Corollary)** *This is a corollary.*

**Definition 5 (A Sample Definition)** *This is a definition.*

**Conjecture 6 (A Sample Conjecture)** *This is a conjecture.*

**Axiom 7 (A Sample Axiom)** *This is an axiom.*

**Example 1 (An Example)** *This is an example.*

## 8. Citations and Bibliography

The `jmlr` class automatically loads `natbib`. This sample file has the citations defined in the accompanying BibTeX file `pmlr-sample.bib`. For a parenthetical citation use `\citep`. For example (Guyon and Elisseeff, 2003). For a textual citation use `\citet`. For example Guyon et al. (2007). Both commands may take a comma-separated list, for example Guyon and Elisseeff (2003); Guyon et al. (2007).

These commands have optional arguments and have a starred version. See the `natbib` documentation for further details.<sup>6</sup>

The bibliography is displayed using `\bibliography`.

## Acknowledgments

Acknowledgements go here.

## References

- I. Guyon and A. Elisseeff. An introduction to variable and feature selection. *JMLR*, 3: 1157–1182, March 2003.
- I. Guyon, C. Aliferis, and A. Elisseeff. Causal feature selection. Technical report, Clopinet, 2007.

## Appendix A. First Appendix

This is the first appendix.

## Appendix B. Second Appendix

This is the second appendix.

---

6. Either `texdoc natbib` or <http://www.ctan.org/pkg/natbib>
